# Supplementary material
Source: PubMed Central journal article supplement (PMC5486414)
Supplement: NIHMS862337-supplement-Supplemental_Digital_Content.pdf [file NIHMS862337-supplement-Supplemental_Digital_Content.pdf]

## Appendix 1.

### Workshop Invited Speakers

Sharon Amatetti, MPH, Substance Abuse and Mental Health Services Administration; Brian Bateman, MD, Massachusetts General Hospital; Susan Brogly, PhD, MSc, Queen's University; Cheryl Broussard, PhD, Center for Disease Control and Prevention; Elizabeth Byrnes, PhD, Tufts University; Steve Caritis, MD, Magee-Womens Hospital; Loretta Finnegan, MD, College on Problems of Drug Dependence; Mark Hudak, MD, University of Florida College of Medicine-Jacksonville; Lauren Jansson, MD, John Hopkins University; Hendree Jones, PhD, University of North Carolina; Elizabeth E. Krans, MD, MSc, Magee-Women's Hospital; Barry Lester, PhD, Brown University; Jennifer N. Lind, PharmD, MPH, Centers for Disease and Prevention; Laurence B. McCullough, PhD, Baylor College of Medicine; Marjorie Meyer, MD, University of Vermont; Lorraine Milio, MD, Johns Hopkins University; Howard Minkoff, MD, Maimonides Medical Center/State University of New York Downstate; David Nielsen, PhD, Baylor College of Medicine; Stephen W. Patrick, MD, MPH, MS, Vanderbilt University; Gary Peltz, MD, PhD, Stanford University; Mishka Terplan, MD, MPH, University of Maryland; Martha Velez, MD, Johns Hopkins University; Robert Ward, MD, University of Utah; Kimberly Yonkers, MD, Yale University

### Invited Participants List:

Sharon Amatetti, MPH, Substance Abuse and Mental Health Services Administration; Stephanie Archer, MA, Eunice Kennedy Shriver National Institute of Child Health and Human Development; Brian Bateman, MD, Massachusetts General Hospital; Janis Bierman, MS, March of Dimes; Debra Bogen, MD, University of Pittsburgh School of Medicine; Cheryl Anne Boyce, PHD, National Institute on Drug Abuse; Coleen Boyle, PHD, MSc, Center for Disease Control and Prevention; Susan Brogly, PHD, MSc, Queen's University; Cheryl Broussard, PHD, Center for Disease Control and Prevention; Elizabeth Byrnes, PHD, Tufts University; Steve Caritas, MD, Magee-Womens Hospital; Maged Costantine, MD, University of Texas Medical Branch at Galveston; Karen D'Apolito, PHD, MSN, NNP-BC, Vanderbilt University; Maurice Davis, PHD, MPA, MHSA, Eunice Kennedy Shriver National Institute of Child Health and Human Development; Jonathan M. Davis, MD, Tufts University; Siobhan Dolan, MD, MPH, March of Dimes; Loretta Finnegan, MD, College on Problems of Drug Dependence; Ariadna Forray, MD, Yale School of Medicine; Suzanne Gilboa, PHD, Centers for Disease Control and Prevention; Michael Greene, MD, Massachusetts General Hospital; Karen Harvey-Wilkes, MD, Tufts Medical Center; Debra Hawks, MPH, American College of Obstetricians and Gynecologists; Rosemary Higgins, MD, Eunice Kennedy Shriver National Institute of Child Health and Human Development; Pamela Horn, Food and Drug Administration; Mark Hudak, MD, University of Florida College of Medicine-Jacksonville; Lauren Jansson, MD, John Hopkins; Hendree Jones, PHD, University of North Carolina; Lisa Kaeser, JD, Eunice Kennedy Shriver National Institute of Child Health and Human Development; Jean Ko, PHD, Centers for Disease Reddy UM, Davis JM, Ren Z, Greene MF. Executive summary of a joint workshop by the *Eunice Kennedy Shriver* National Institute of Child Health and Human Development, American Congress of Obstetricians and Gynecologists, American Academy of Pediatrics, Society for Maternal-Fetal Medicine, Centers for Disease Control and Prevention, and the March of Dimes Foundation. *Obstet Gynecol* 2017; 129.

The authors provided this information as a supplement to their article.

Control; Marion Koso-Thomas, MD, MPH, Eunice Kennedy Shriver National Institute of Child Health and Human Development; Elizabeth E. Krans, MD, MSc, Magee-Womens Hospital; Victoria Kuck, Parent Advisor, Improving Care of the Opiate-exposed Newborn; Barry Lester, PHD, Brown University; Jennifer Lind, Pharm.D, MPH, Centers for Disease and Prevention; Jeanne Mahoney, BSN, RN, American College of Obstetricians and Gynecologist; Laurence B. McCullough, PHD, Baylor College of Medicine; Marjorie Meyer, MD, University of Vermont; Lorraine Milio, MD, Johns Hopkins University; Howard Minkoff, MD, Maimonides Medical Center/State University of New York (SUNY) Downstate; Menachem Miodovnik, MD, Eunice Kennedy Shriver National Institute of Child Health and Human Development; David Nielsen, PHD, Baylor College of Medicine; Stephen W. Patrick, MD, MPH, MS, Vanderbilt University; Gary Peltz, MD, PHD, Stanford University; Jonathan Pollock, PHD, National Institute on Drug Abuse; Tonse Raju, MD, Eunice Kennedy Shriver National Institute of Child Health and Human Development; Venkat Raman, PHD, University of Pittsburgh School of Medicine; Laura Rasmussen-Torvik, PHD, MPH, Northwestern University Feinberg School of Medicine; Shona Ray-Griffith, MD, University of Arkansas for Medical Sciences; Uma M. Reddy, MD, MPH, Eunice Kennedy Shriver National Institute of Child Health and Human Development; Ren Zhaoxia MD, PhD, Eunice Kennedy Shriver National Institute of Child Health and Human Development; Kelly Saia, MD, Boston University School of Medicine; Amy Salisbury, PHD, APRN, Women and Infants Hospital and Brown Medical School; Anne Santa-Donato, MSN, RNC, Association of Women's Health, Obstetric, and Neonatal Nurses; Laura Sherman, PHD, Substance Abuse and Mental Health Services Administration; Lara Siminerio, Pharm.D, PHD Candidate, University of Pittsburgh School of Medicine; Beth Steele, Society for Maternal-Fetal Medicine; Catherine Stika, MD, Northwestern University Feinberg School of Medicine; Megan Stover, MD Tuft Medical Center; Perdita Taylor-Zapata, MD, Eunice Kennedy Shriver National Institute of Child Health and Human Development; Mishka Terplan, MD, MPH, University of Maryland; Rachel Tetlow, American College of Obstetricians and Gynecologists; Rosenie Thelus, PHD, Department of the Army Medical Command; Susan Tolivaia, Eunice Kennedy Shriver National Institute of Child Health and Human Development; Craig Towers, MD, University of Tennessee Medical Center; Ramen Venkat, University of Pittsburgh School of Medicine; Martha Velez, MD, Johns Hopkins University; Margaret Villalonga, American College of Obstetricians and Gynecologists; Alice Wang, MD, Boston University School of Medicine; Robert Ward, MD, University of Utah; Katherine Wisner, MD, MS, Northwestern University Feinberg School of Medicine; Kim Yonkers, MD, Yale University; Christopher Zahn, MD, American College of Obstetricians and Gynecologists; Anne Zajicek, MD, Pharm.D, Eunice Kennedy Shriver National Institute of Child Health and Human Development.

Reddy UM, Davis JM, Ren Z, Greene MF. Executive summary of a joint workshop by the *Eunice Kennedy Shriver* National Institute of Child Health and Human Development, American Congress of Obstetricians and Gynecologists, American Academy of Pediatrics, Society for Maternal-Fetal Medicine, Centers for Disease Control and Prevention, and the March of Dimes Foundation. *Obstet Gynecol* 2017; 129.

The authors provided this information as a supplement to their article.
